# Supplementary material for: Conductive network enhanced self-assembled diphasic Prussian blue analogs for aqueous zinc-ion batteries
Source: Royal Society of Chemistry journal article supplement (doi:10.1039/d4tc05159a), 2025-01-01
Supplement: d4tc05159a1.pdf [file d4tc05159a1.pdf]

## Supporting information

### **A conductive network enhanced self-assembled diphasic Prussian blue analogs for aqueous zinc-ion batteries**

Bingbing Hu<sup>\*=a</sup>, Dongshan Li<sup>=a</sup>, Meixin Li<sup>a</sup>, Jiayu Jiang<sup>a</sup>, Ye Zou<sup>a</sup>, Yu Deng<sup>a</sup>, Zideng Zhou<sup>a</sup>, Hong Pu<sup>b</sup>, Guangqiang Ma<sup>b</sup>, Zhi Li<sup>\*a</sup>

<sup>a</sup> *China-Spain Collaborative Research Center for Advanced Materials, College of Materials Science and Engineering, Chongqing Jiaotong University, Chongqing 400074, China*

<sup>b</sup> *Sichuan Vanadium Titanium Materials Engineering Technology Research Center, Panzhihua University, Panzhihua 617000, Sichuan, China.*

*\*Corresponding Authors: Bingbing Hu*

*\*E-mail: hubingbing@cqjtu.edu.cn*

*\*ORCID: 0000-0003-0185-3905*

*= Representative same contributions*

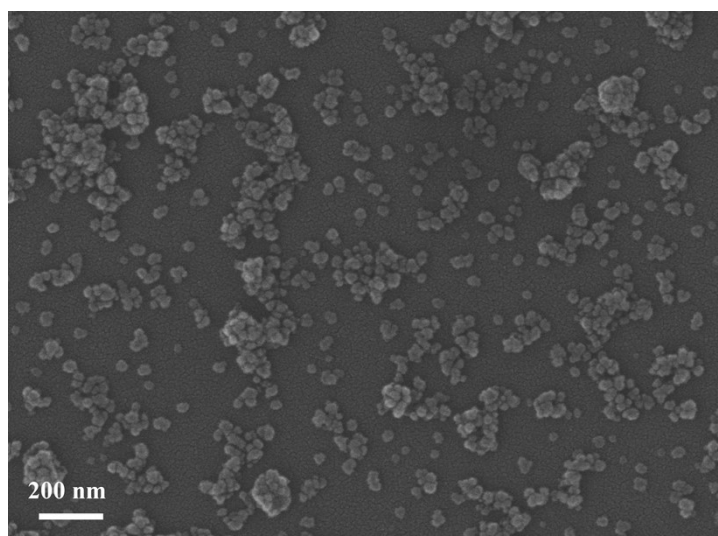

Fig. S1 SEM images of VOHCF

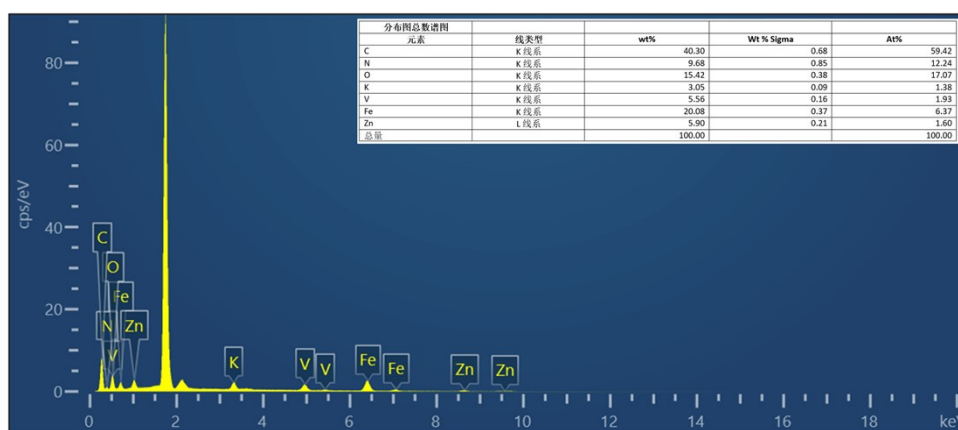

Fig. S2 Elemental distribution general spectrum of ZnVHCF@rGO

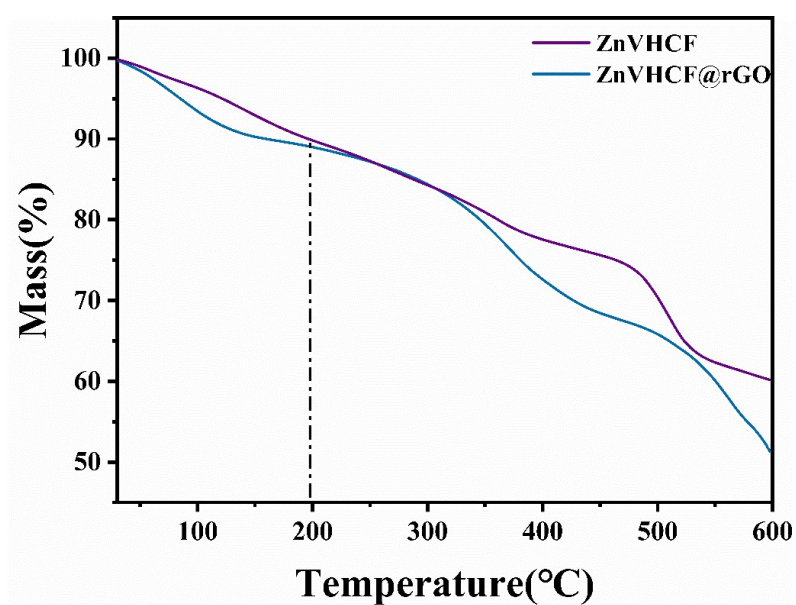

Fig. S3 TG curves of ZnVHCF and ZnVHCF@rGO

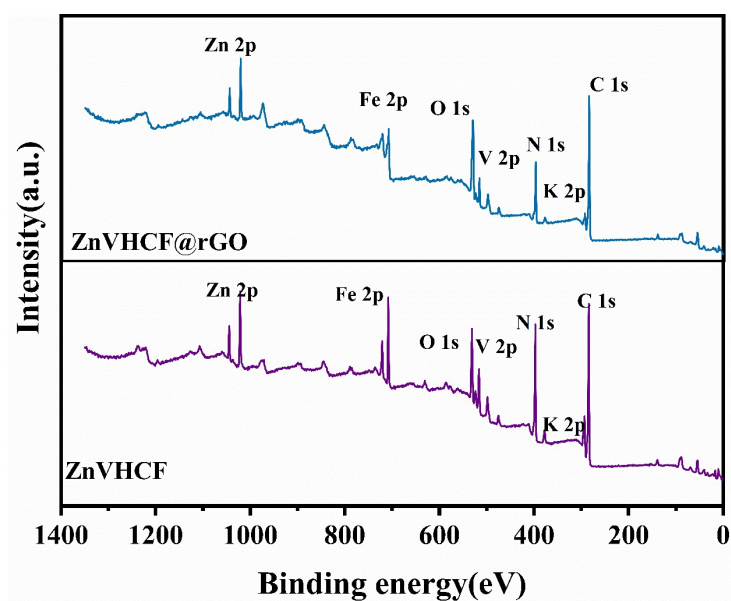

Fig. S4 Full XPS spectra of ZnVHCF and ZnVHCF@rGO

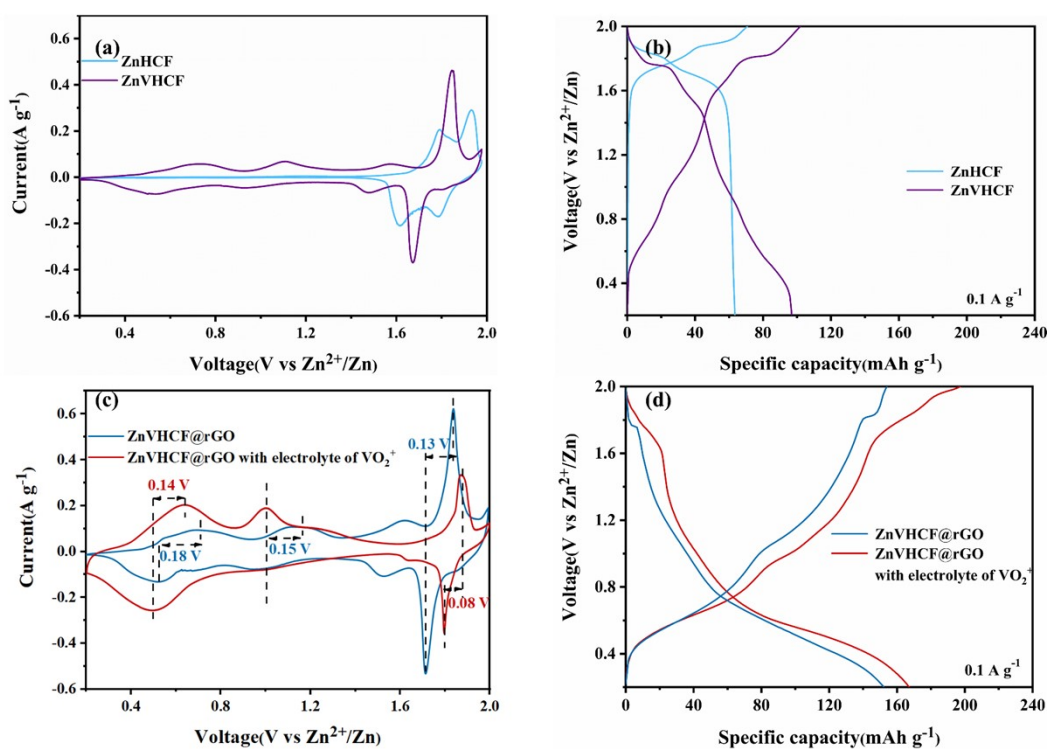

Fig. S5 (a) CV curves at  $0.2 \text{ mV s}^{-1}$  and (b) GCD curves at  $0.1 \text{ A g}^{-1}$  of ZnHCF and ZnVHCF; (c) CV curves at  $0.2 \text{ mV s}^{-1}$  and (d) GCD curves at  $0.1 \text{ A g}^{-1}$  of ZnVHCF@rGO and ZnVHCF@rGO with electrolyte of  $\text{VO}_2^{2+}$ ;

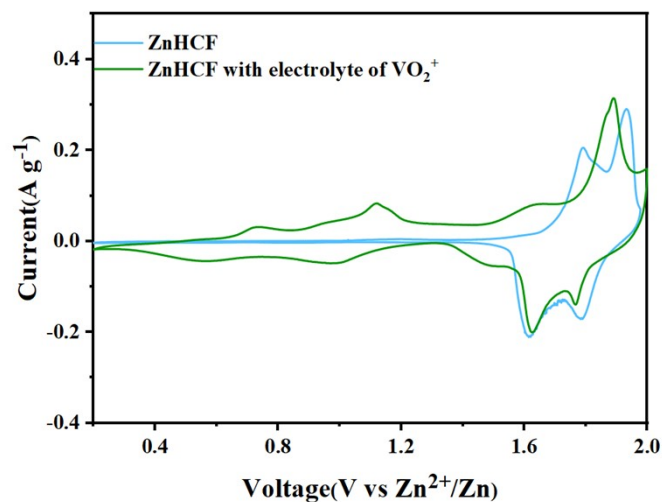

Fig. S6 CV curves at  $0.2 \text{ mV s}^{-1}$  of ZnHCF in two electrolytes

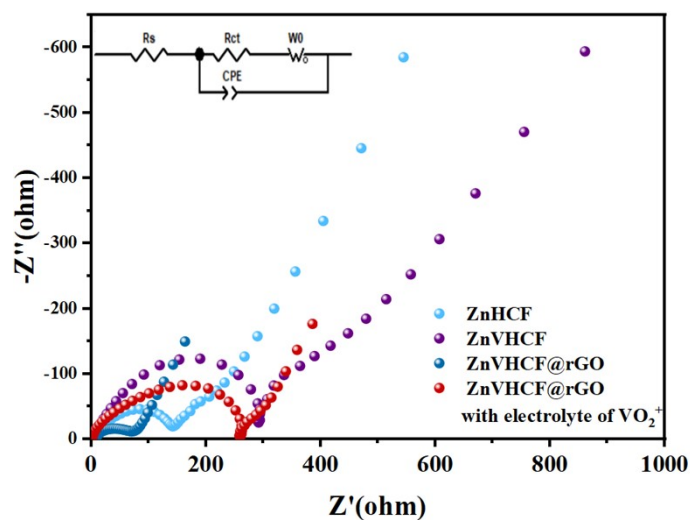

Fig. S7 Nyquist plots

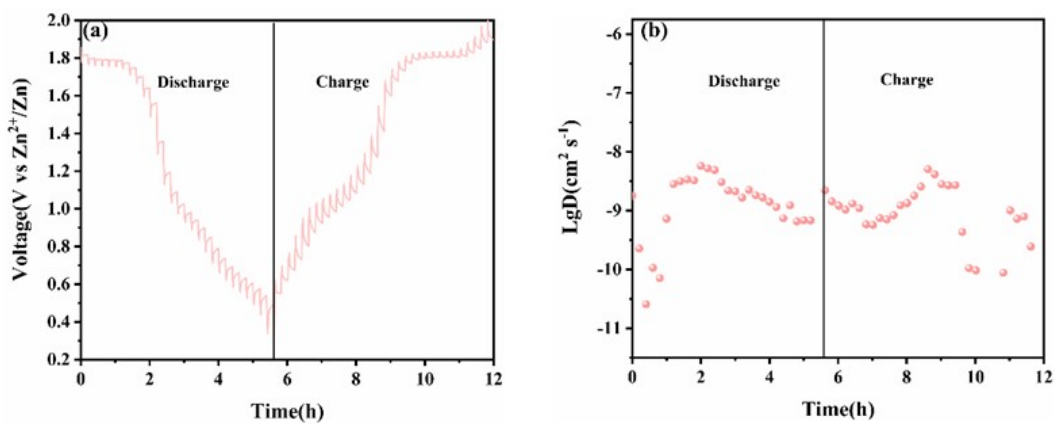

Fig. S8 (a)GITT bright and (b) the corresponding ion diffusion coefficients for ZnVHCF

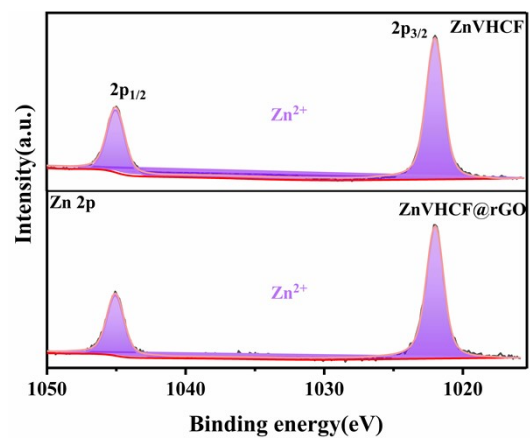

Fig. S9 Zn 2p at the charge/discharge for ZnVHCF@rGO
